# Supplementary material for: Chiral Thianthrenes
Source: MDPI journal article supplement (doi:10.3390/ijms25084311), 2024-04-13
Supplement: s1 [file s1]

## Infrared Charts of Compounds 6-7, 9-11.

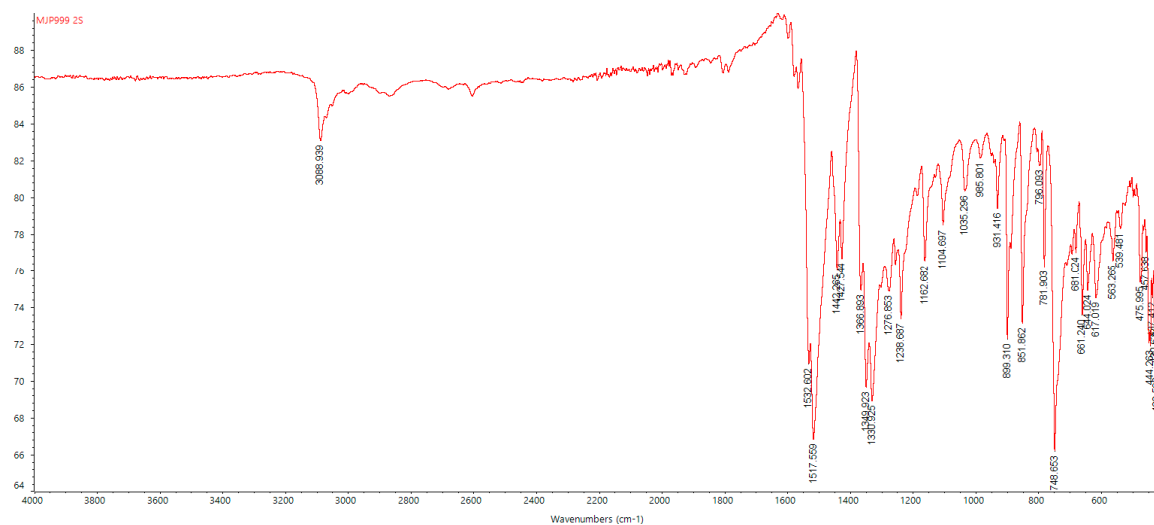

6

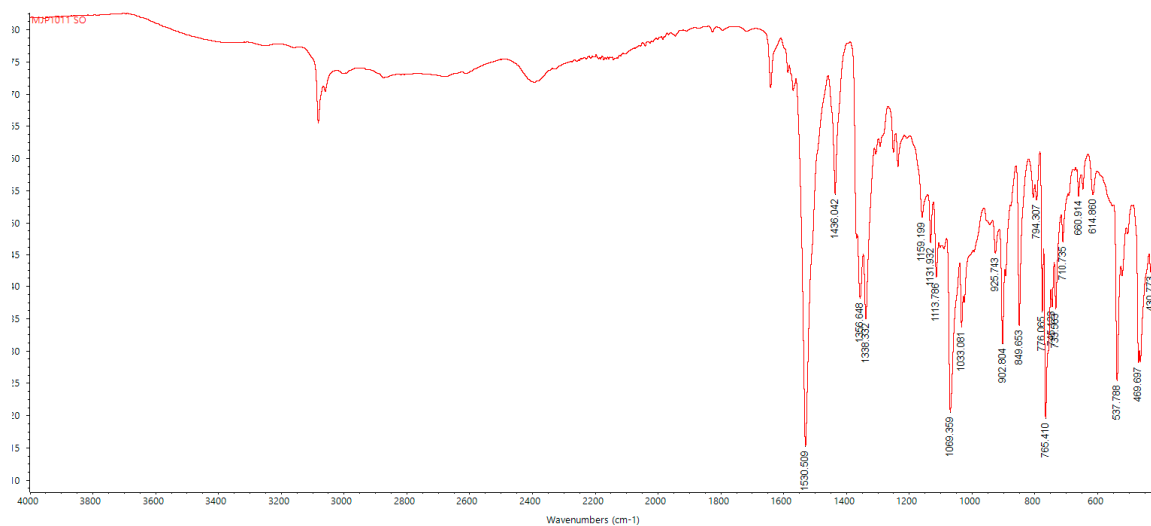

7

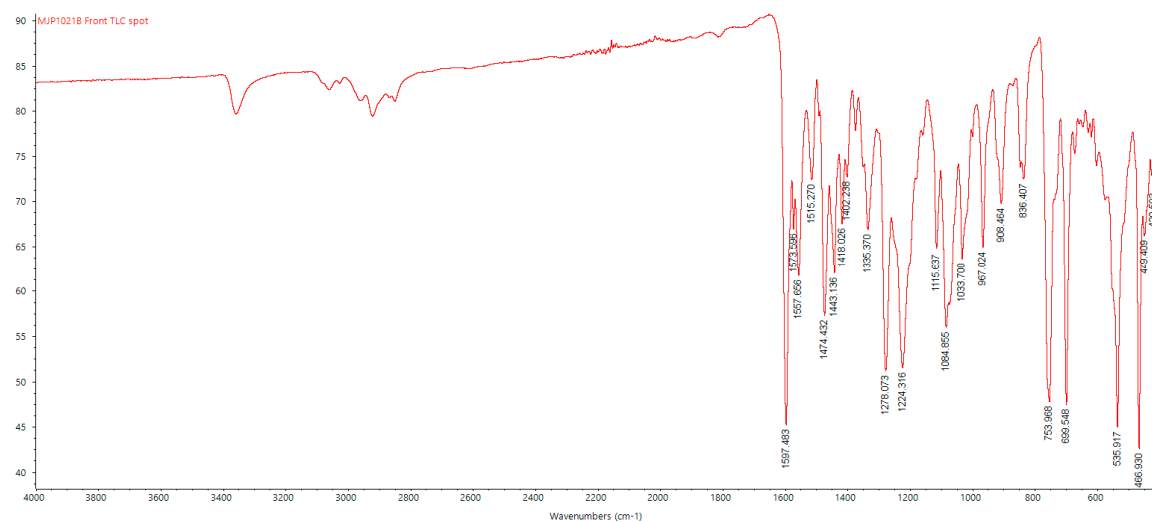

9

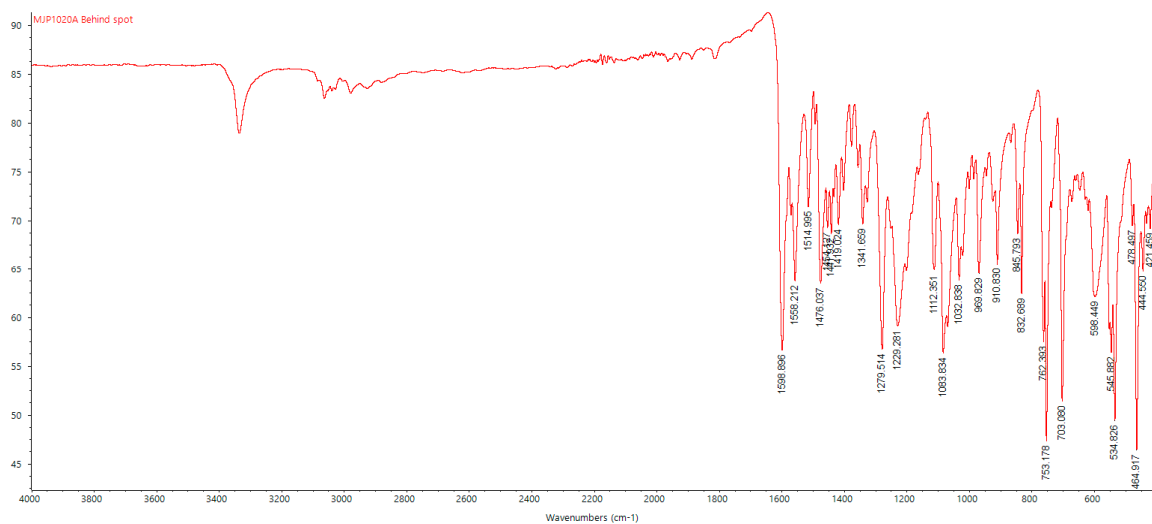

10

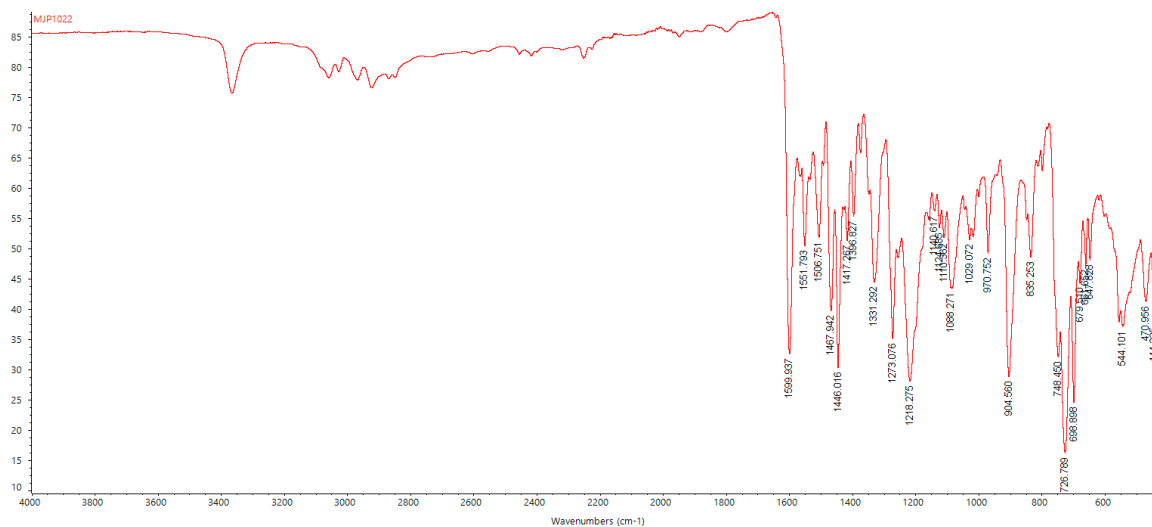

11

## Proton and 13 Carbon NMR charts

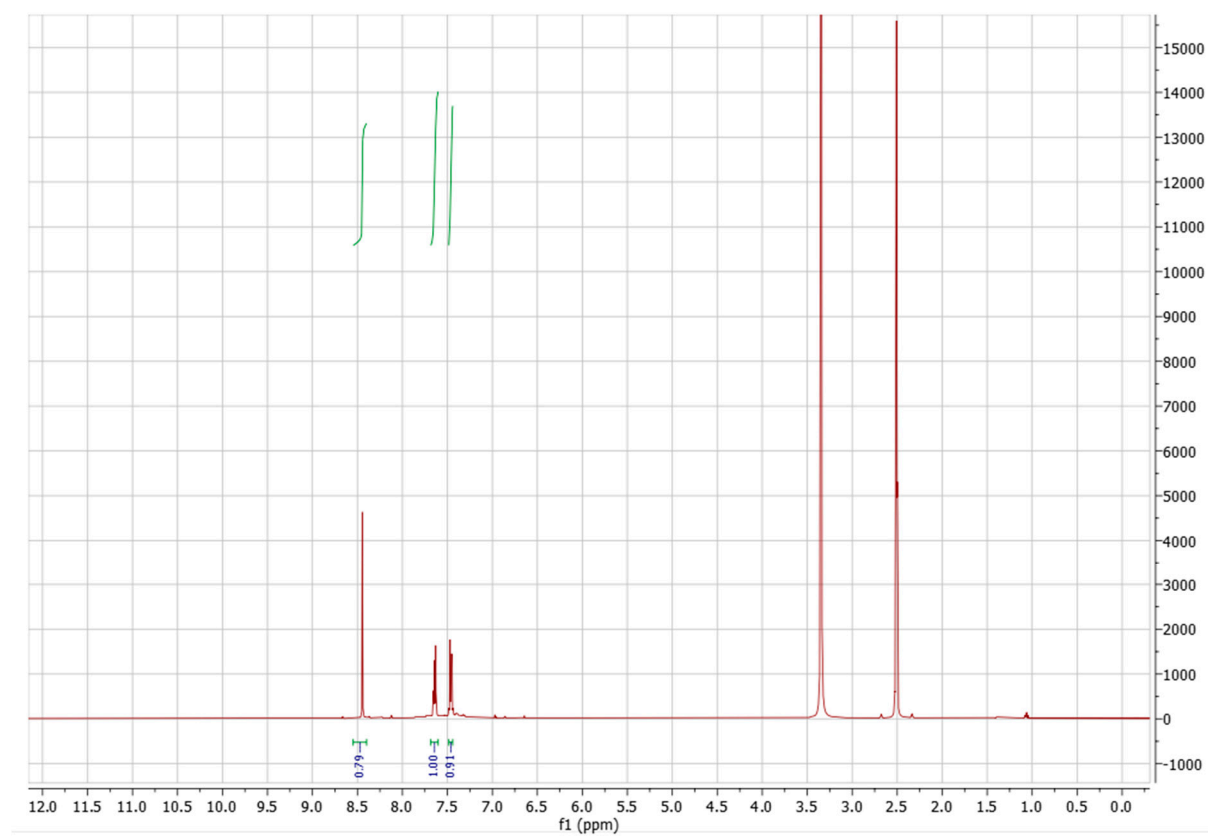

**6** 400 MHz Proton NMR D<sub>6</sub>DMSO The peak at 2.5 ppm is DMSO and the peak at 3.4 ppm is water.

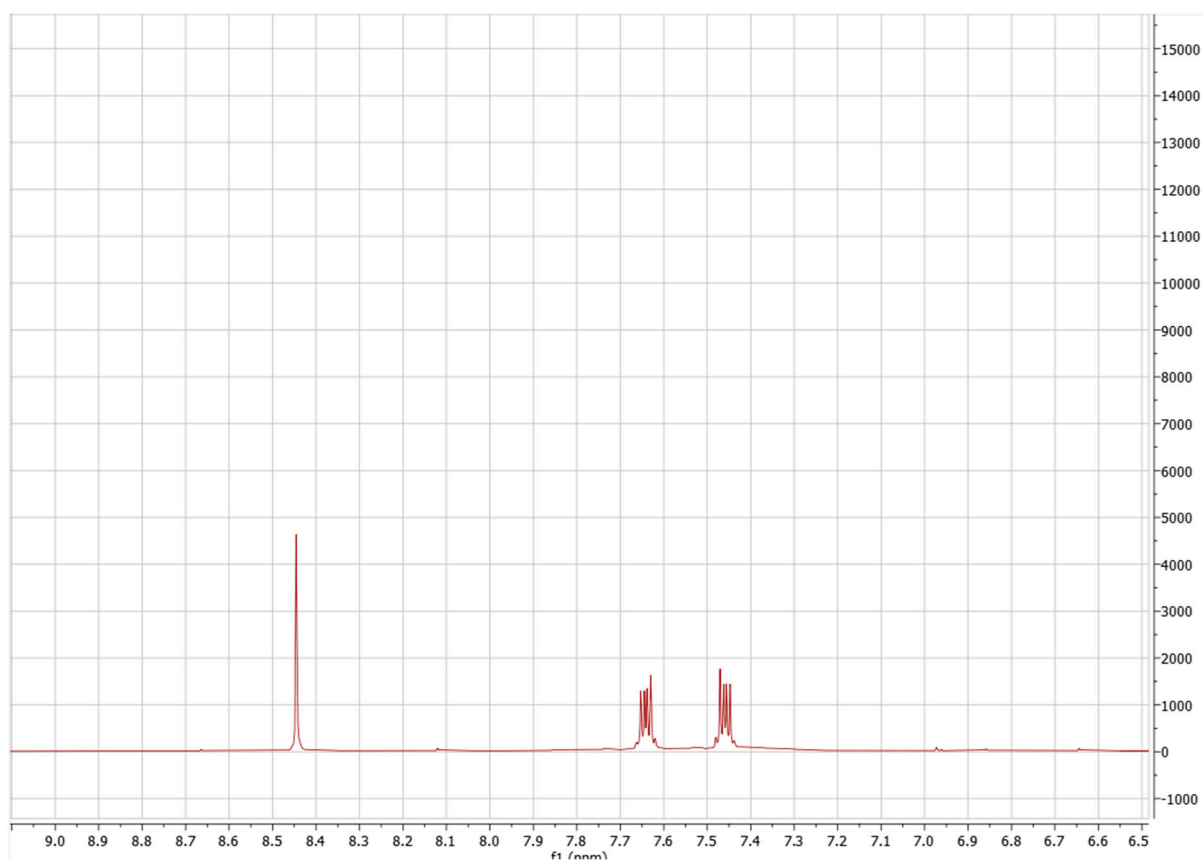

**6** 400 MHz Proton NMR D<sub>6</sub>DMSO Expansion

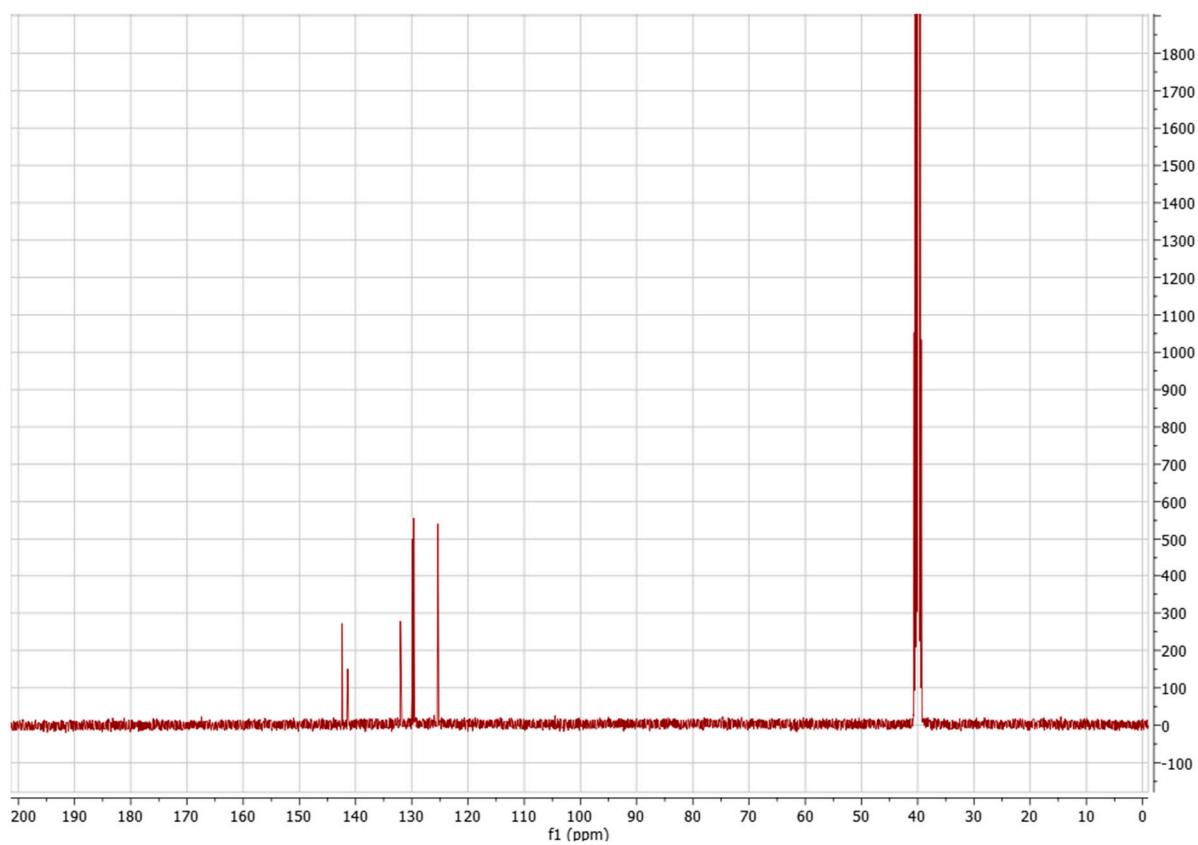

6 400 MHz  $^{13}\text{C}$  NMR  $\text{D}_6\text{DMSO}$

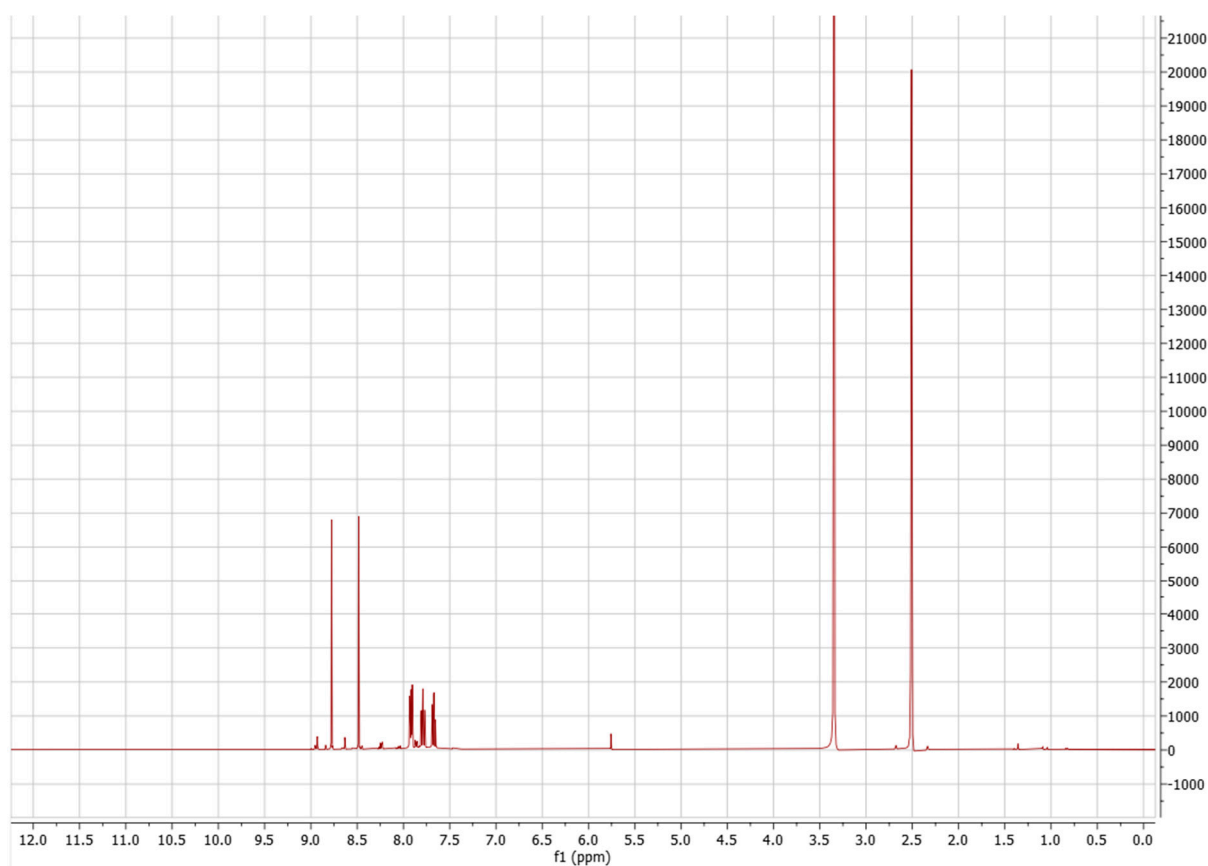

7 400 MHz Proton NMR D<sub>6</sub>DMSO The peak at 2.5 ppm is DMSO and the peak at 3.4 ppm is water.

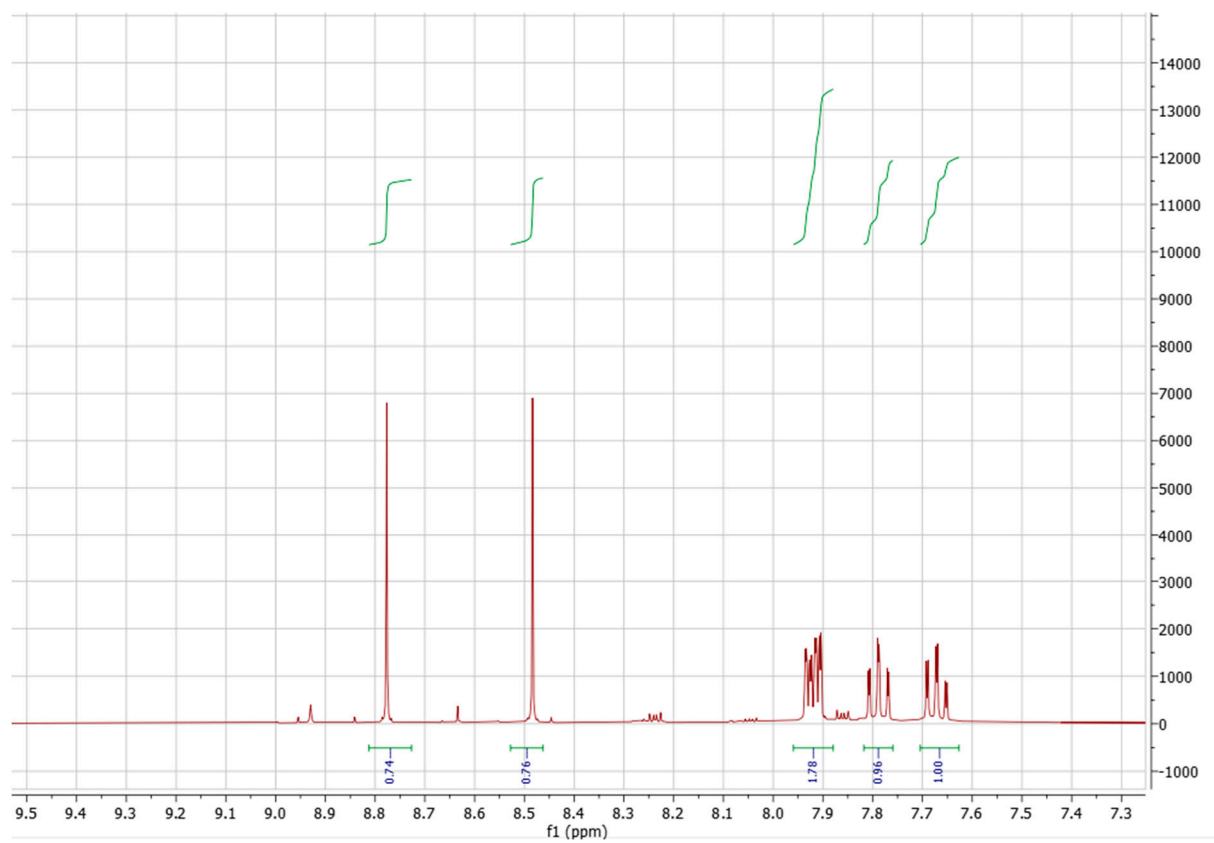

7 400 MHz Proton NMR D<sub>6</sub>DMSO Expansion

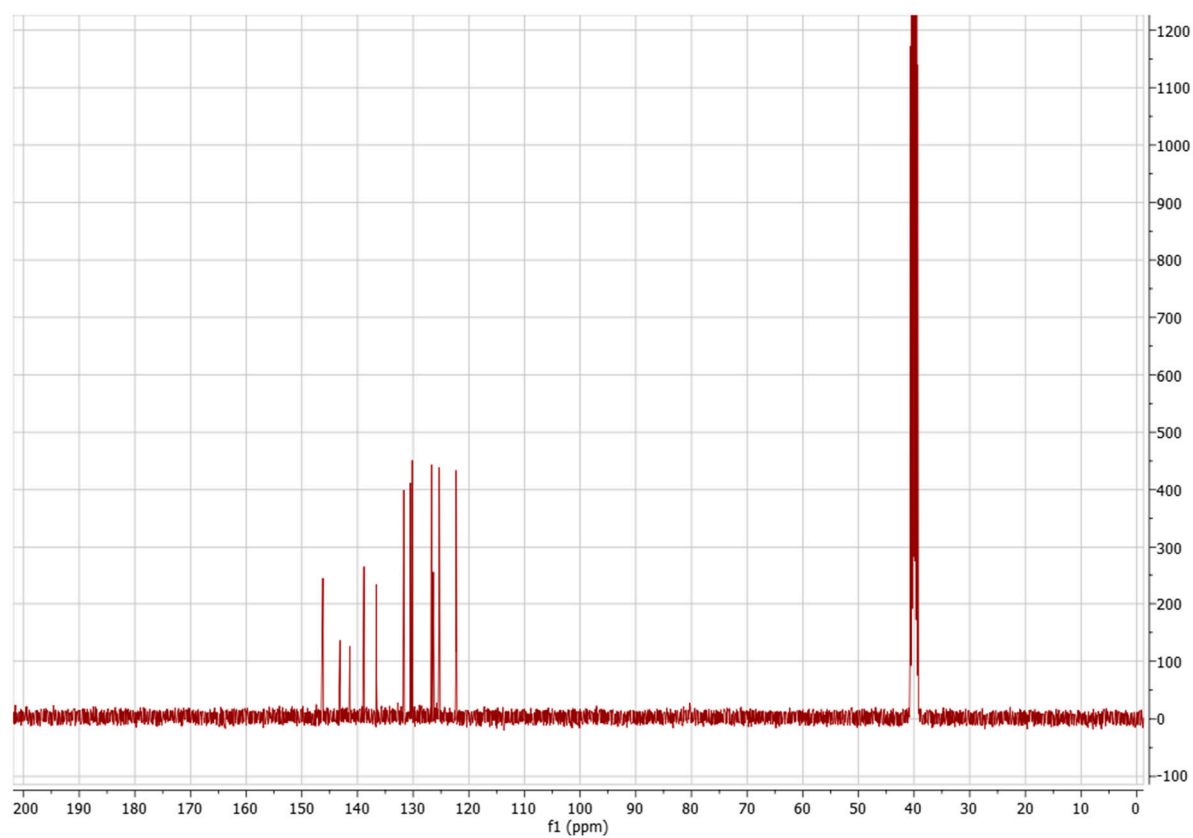

7 400 MHz <sup>13</sup> Carbon D<sub>6</sub>DMSO NMR



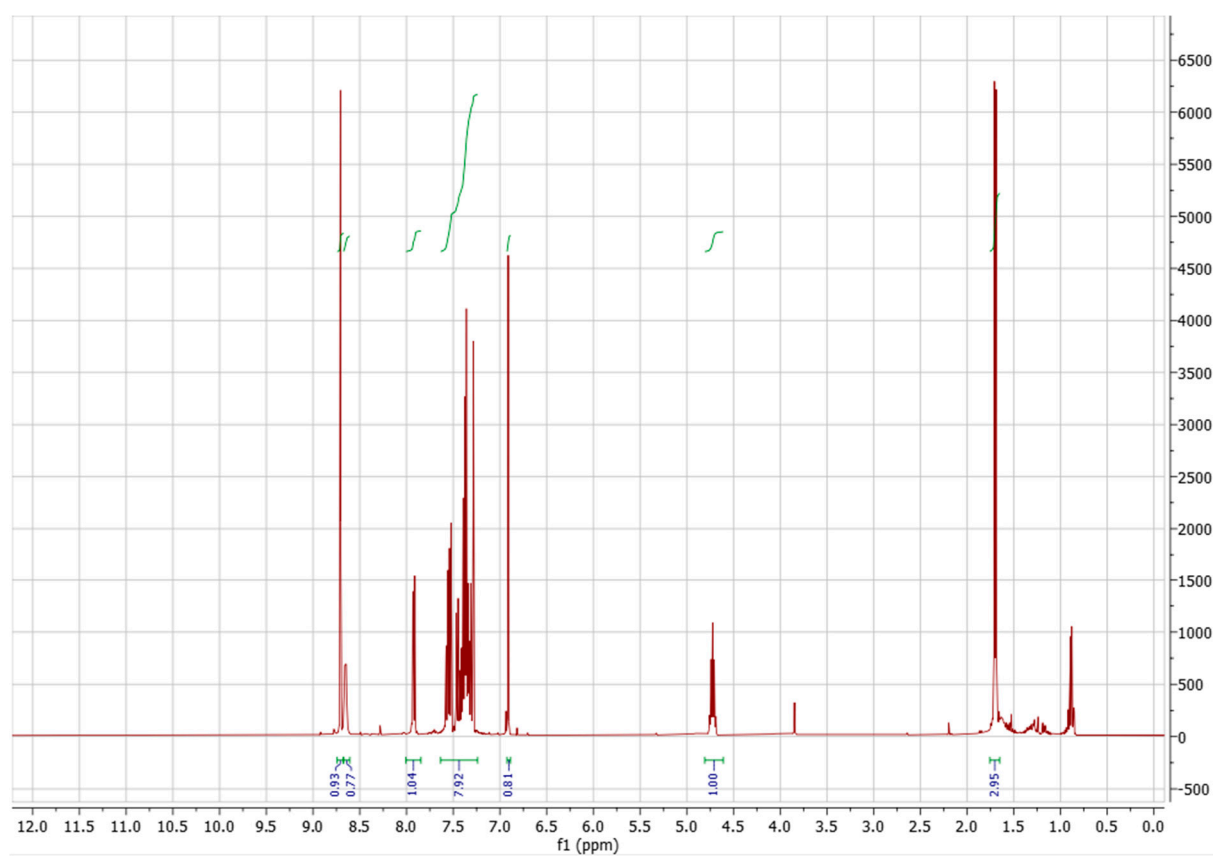

**9** 400 MHz Proton NMR CDCl<sub>3</sub>

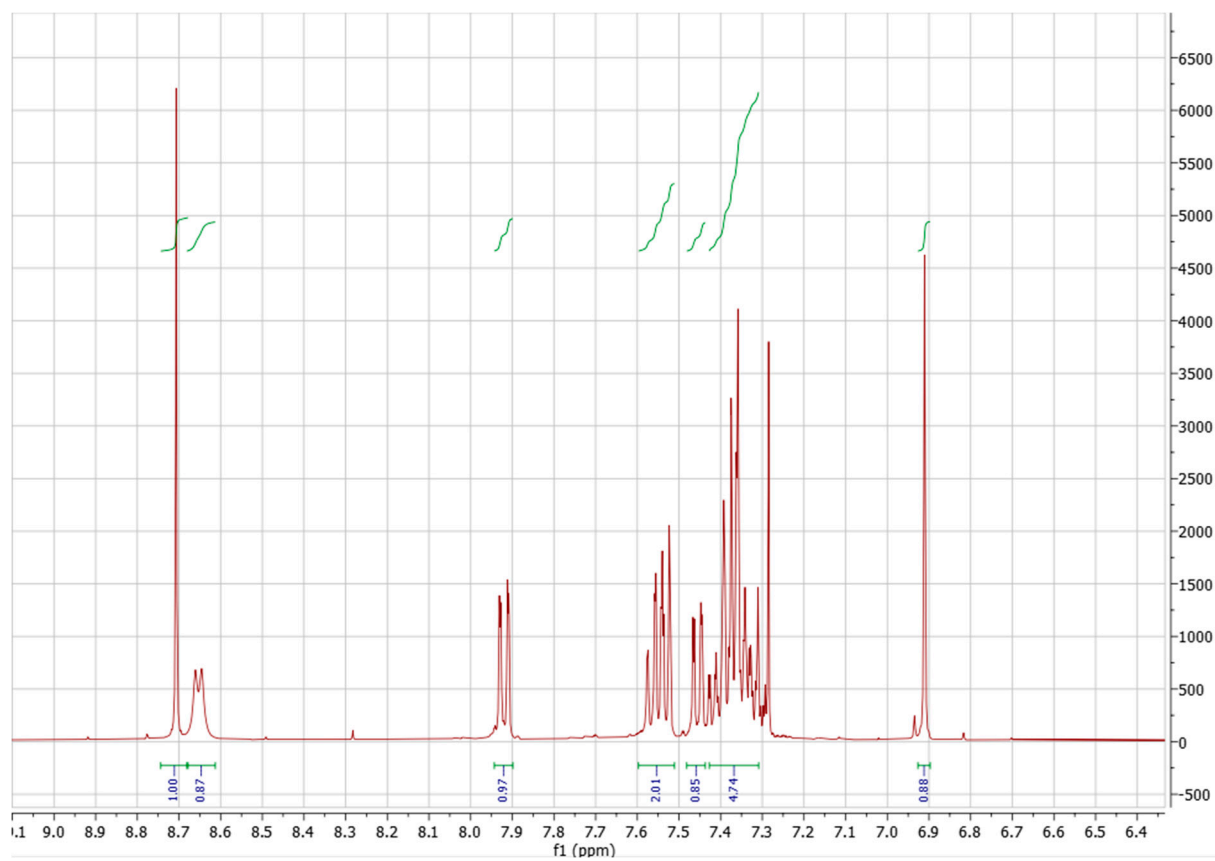

9 400 MHz Proton NMR CDCl<sub>3</sub> Expansion

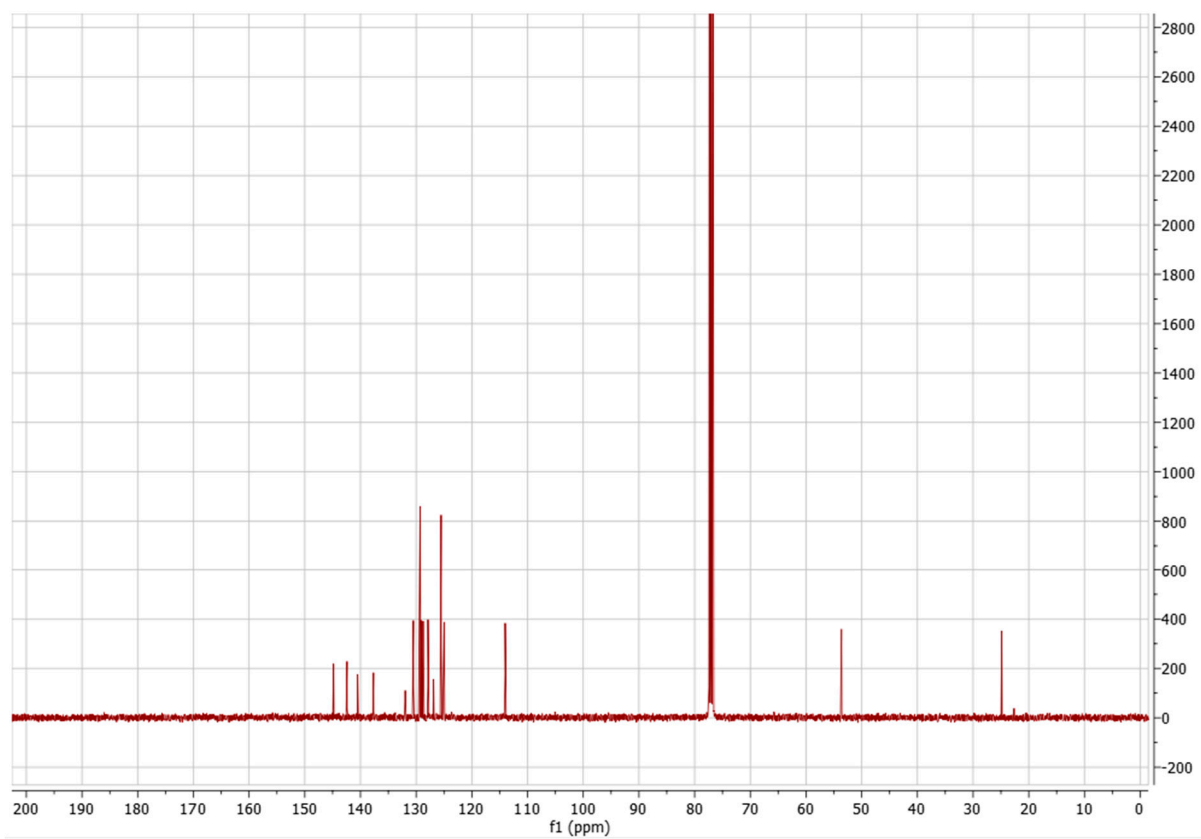

9 400 MHz <sup>13</sup>Carbon NMR CDCl<sub>3</sub>

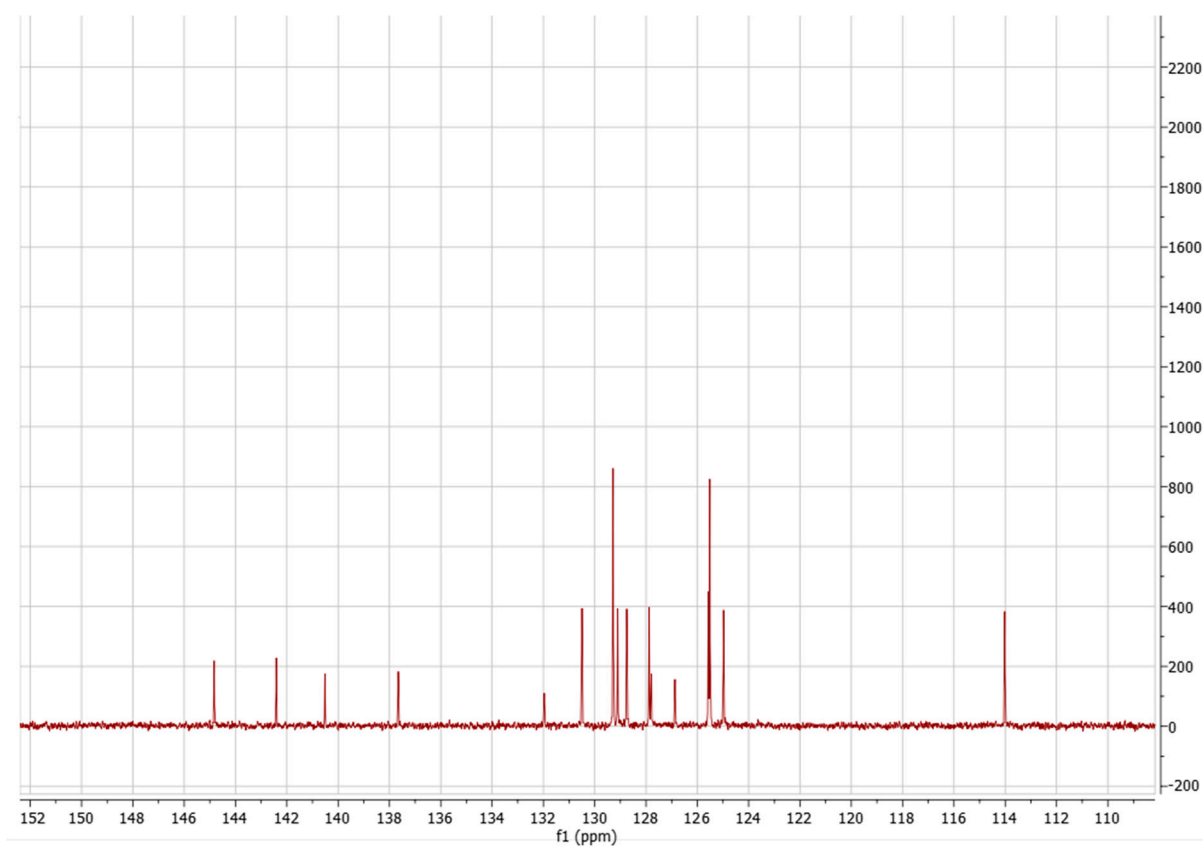

9 400 MHz <sup>13</sup>Carbon NMR CDCl<sub>3</sub> Expansion

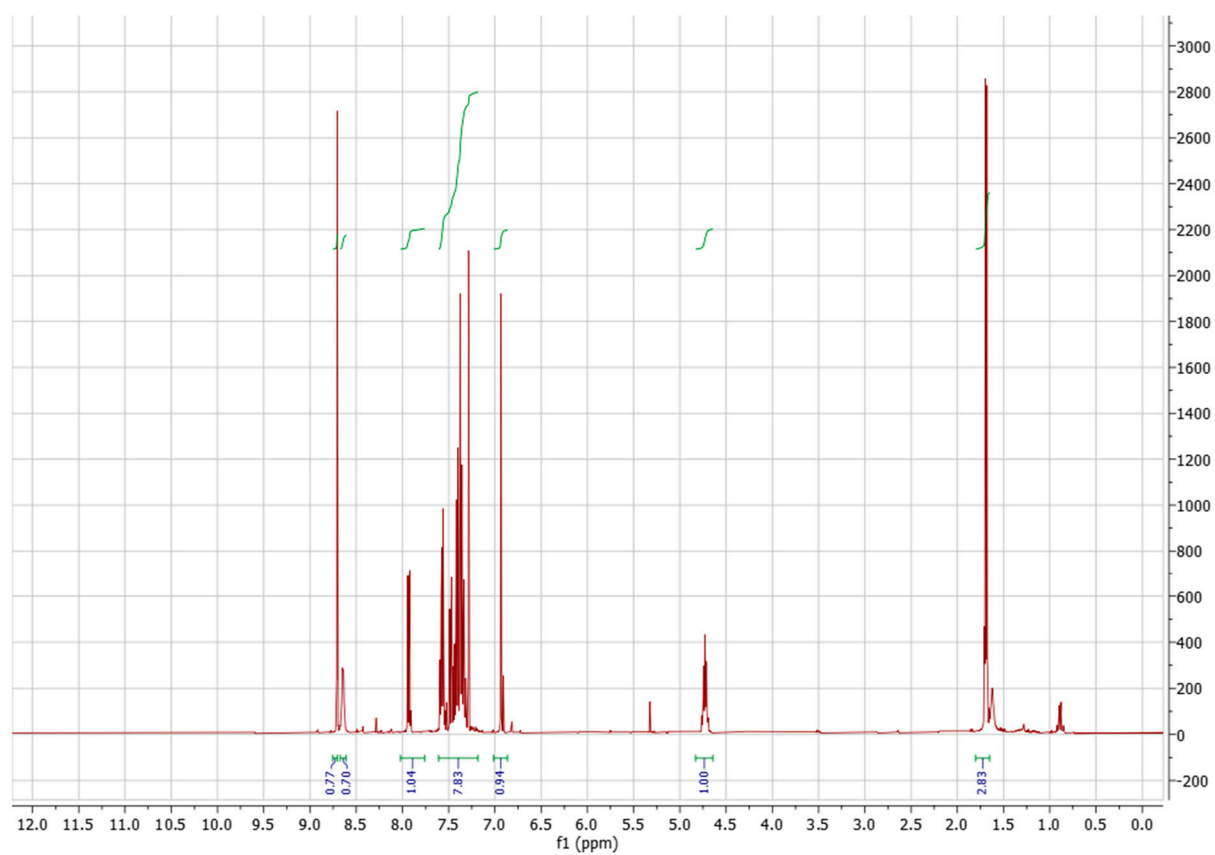

**10** 400 MHz Proton NMR CDCl<sub>3</sub>

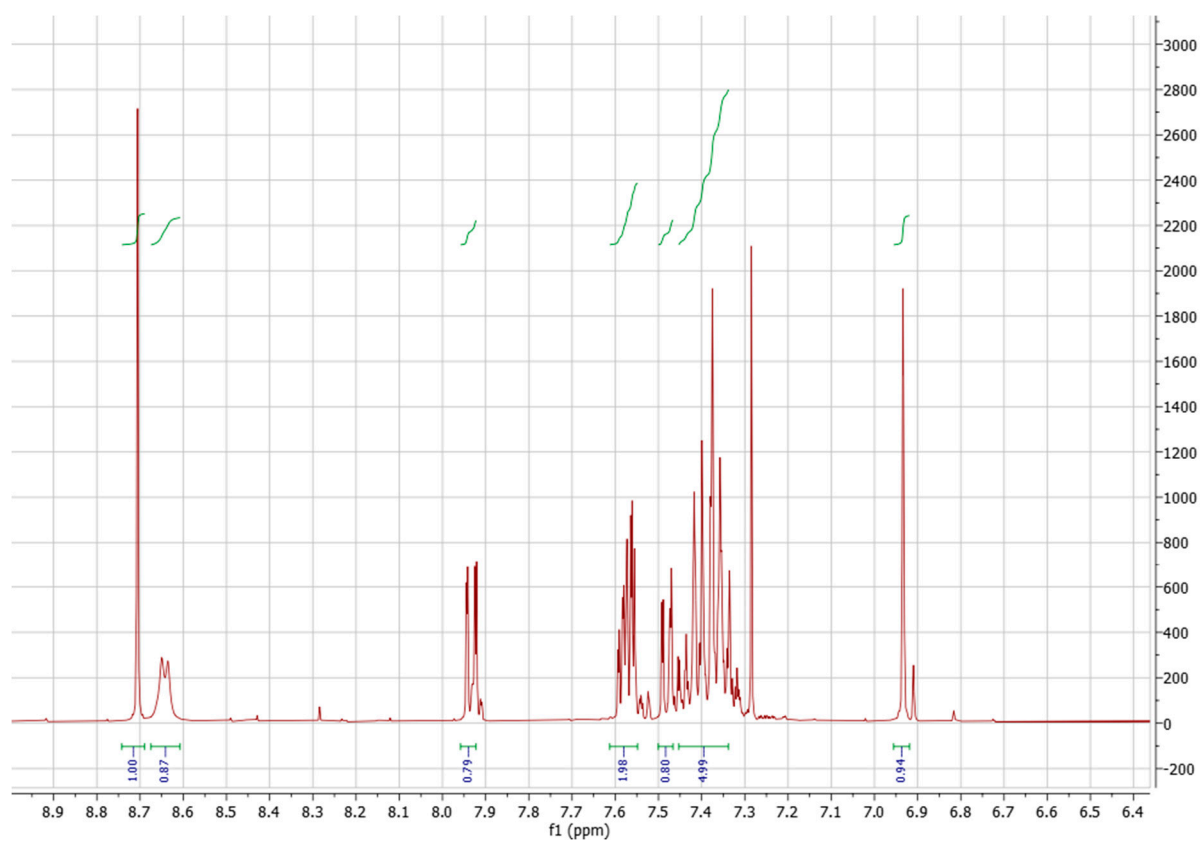

**10** 400 MHz Proton NMR CDCl<sub>3</sub> Expansion

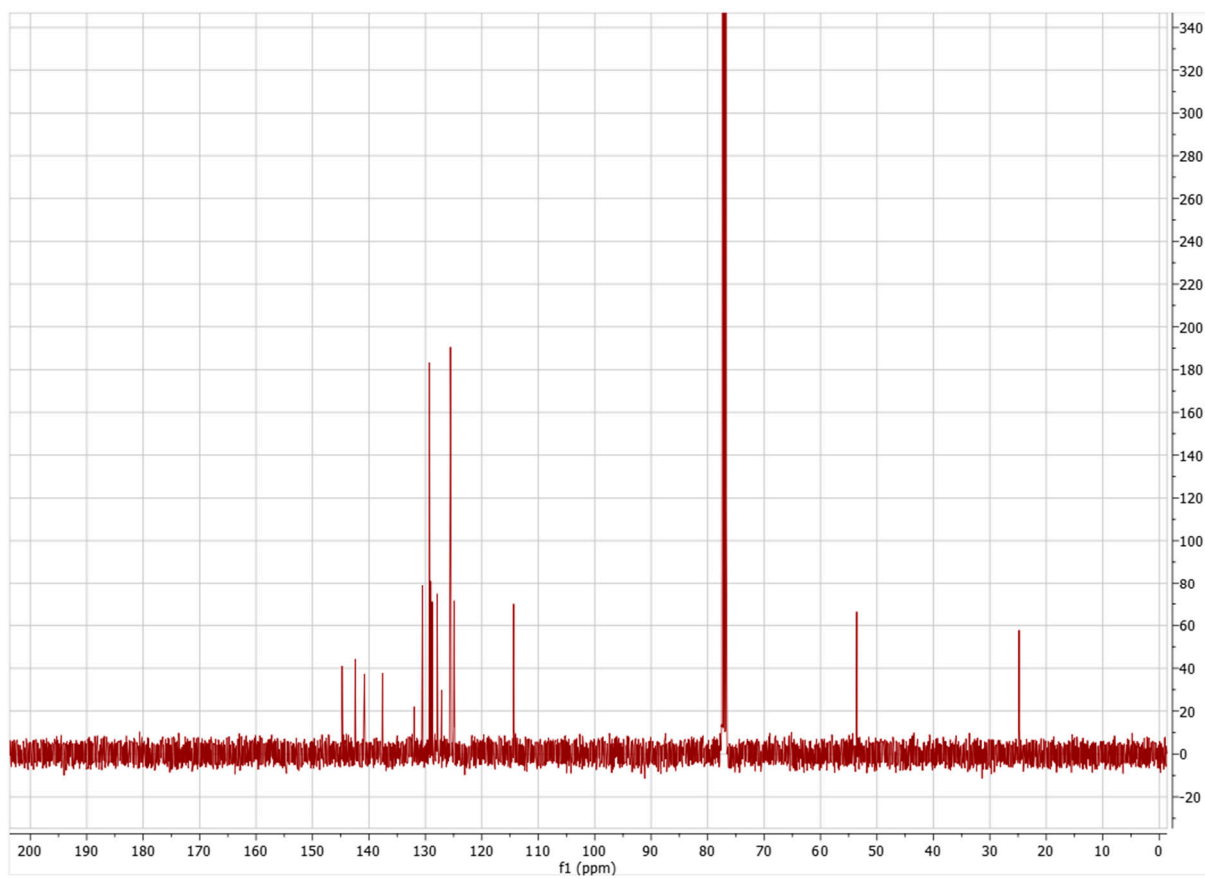

**10** 400 MHz  $^{13}\text{C}$  NMR  $\text{CDCl}_3$

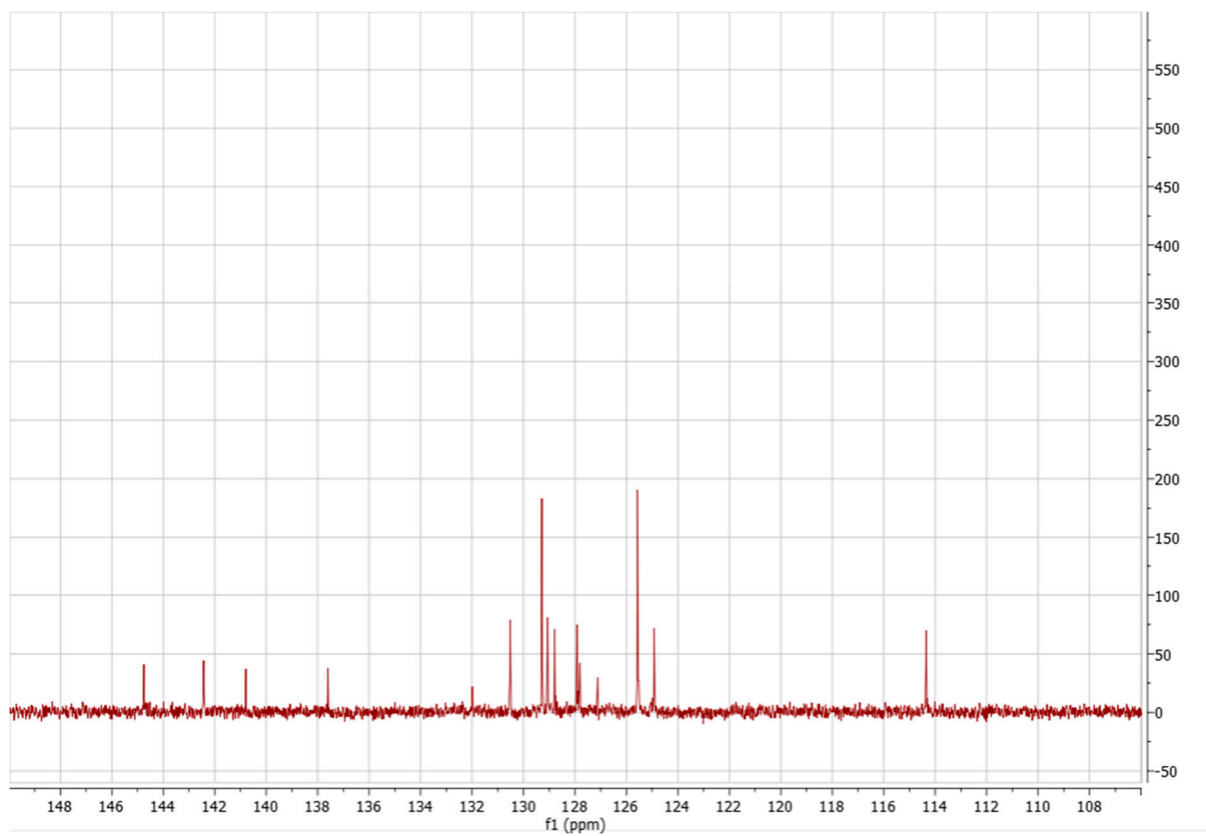

**10** 400 MHz <sup>13</sup> Carbon NMR CDCl<sub>3</sub> Expansion



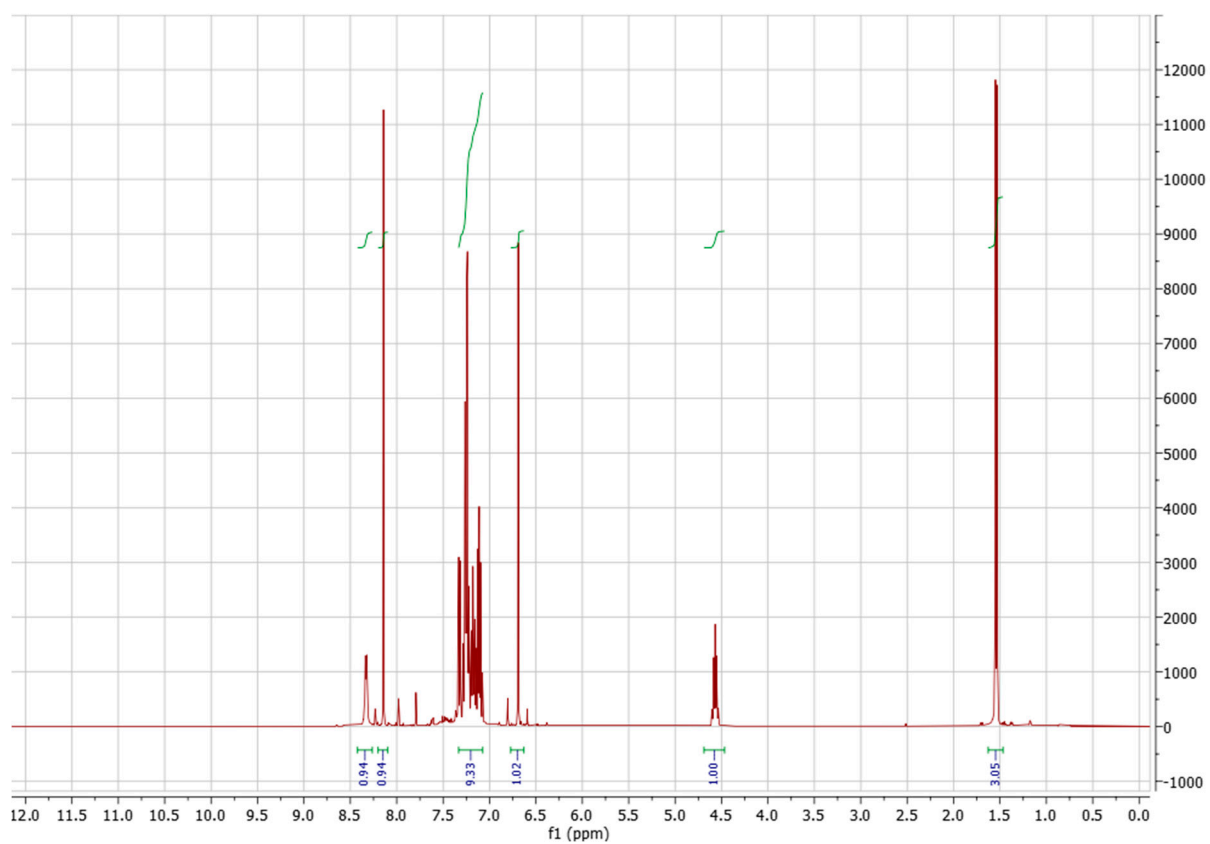

11 400 MHz Proton NMR CDCl<sub>3</sub>

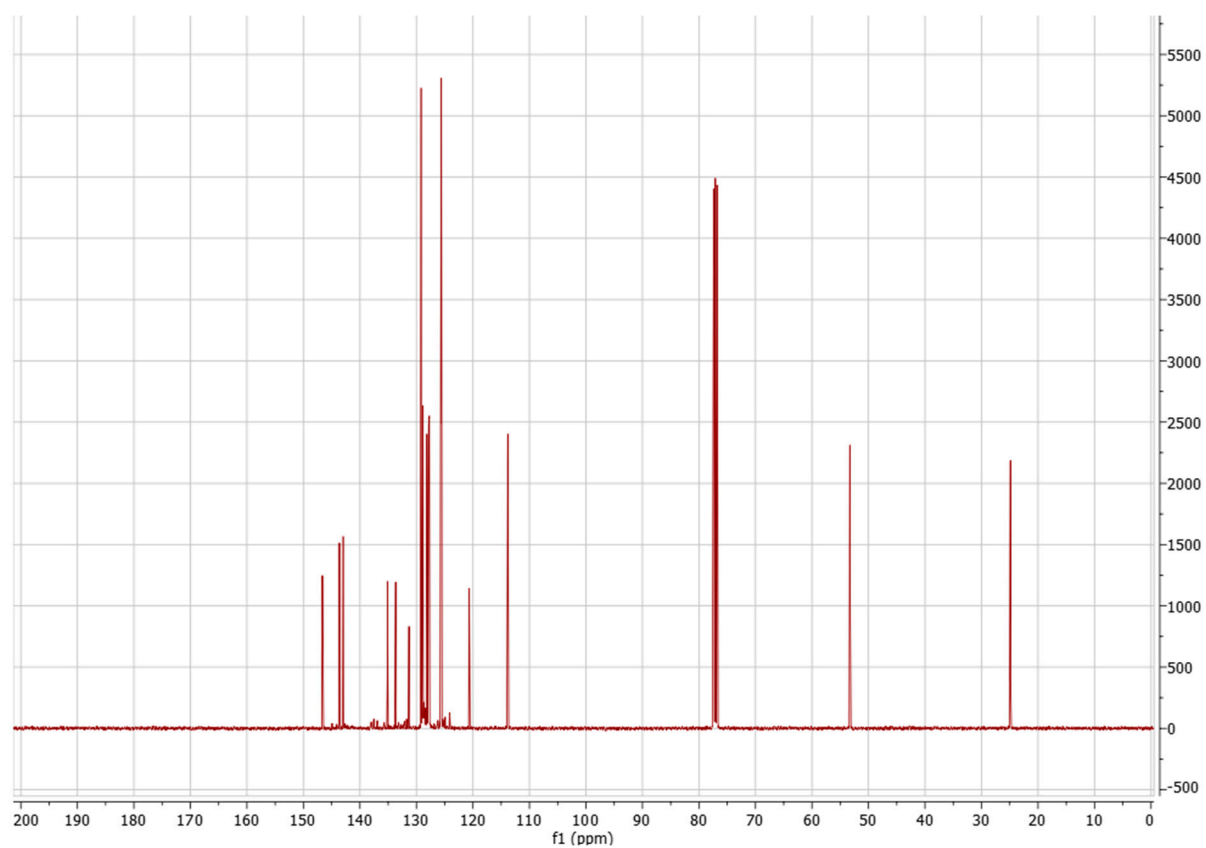

11 400 MHz <sup>13</sup> Carbon NMR CDCl<sub>3</sub>

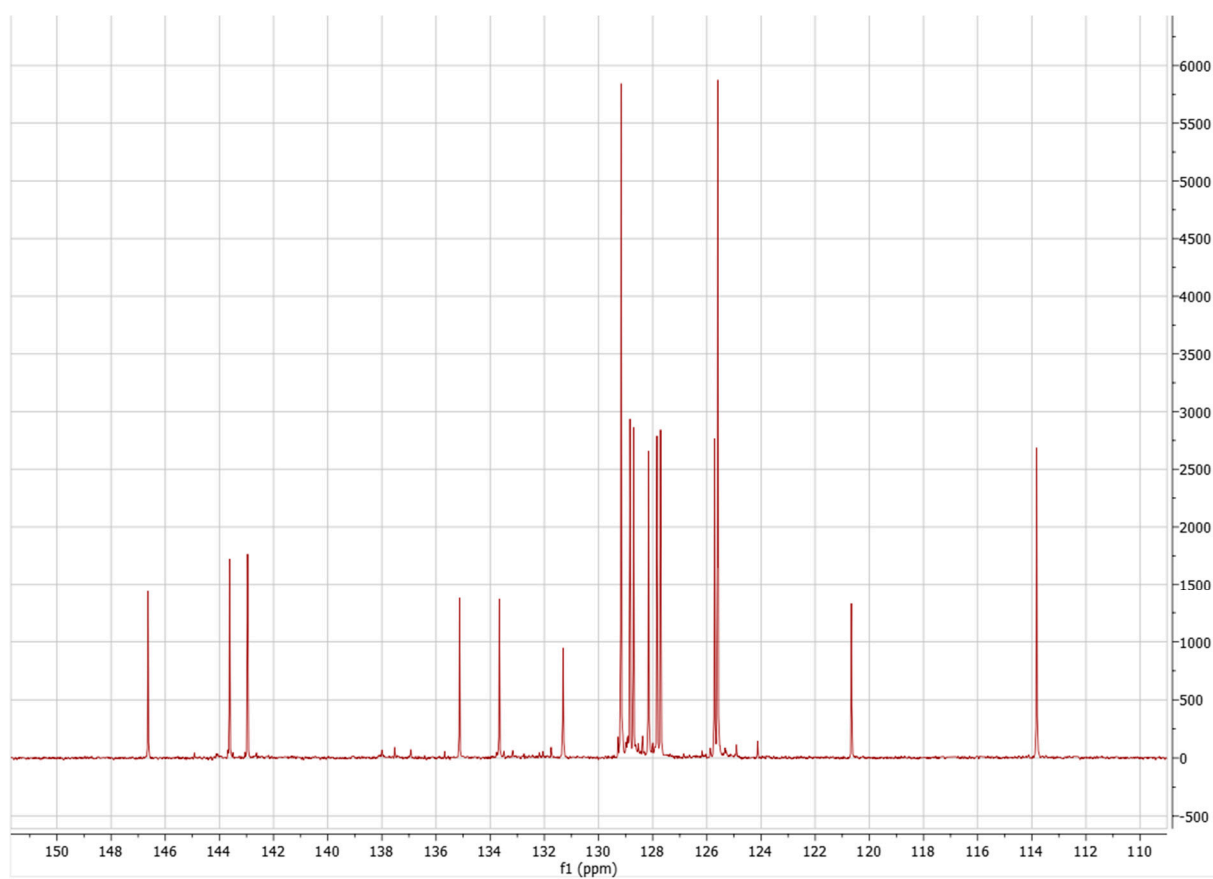

**11** 400 MHz <sup>13</sup> Carbon NMR CDCl<sub>3</sub> Expansion
